# Supplementary material for: A simple tactic synthesis of hollow porous graphitic carbon nitride with significantly enhanced photocatalytic performance
Source: Royal Society of Chemistry journal article supplement (doi:10.1039/d1cc02355a), 2021-01-01
Supplement: d1cc02355a1.pdf [file d1cc02355a1.pdf]

## **Supporting information to Chemical Communications**

### **A simple tactic synthesis of hollow porous graphitic carbon nitride with significantly enriched photocatalytic performance**

Vellaichamy Balakumar <sup>a\*</sup>, Ramalingam Manivannan <sup>b</sup>, Chitiphon Chuaicham <sup>a</sup>, Sekar Karthikeyan <sup>a</sup> and Keiko Sasaki <sup>a\*</sup>

<sup>a</sup> Department of Earth Resources Engineering, Faculty of Engineering, Kyushu University, 744 Motooka, Nishiku, Fukuoka 819-0395, Japan

<sup>b</sup> Department of Advanced Organic Materials Engineering, Chungnam National University, 220 Gung-dong, Yuseong-gu, Daejeon 305-764, South Korea

Corresponding authors: \*

E-mail: [keikos@mine.kyushu-u.ac.jp](mailto:keikos@mine.kyushu-u.ac.jp), (Prof. Keiko Sasaki), Tel: +81-92-802-3338, ORCID id: <http://orcid.org/0000-0002-2882-0700> & [kumar@mine.kyushu-u.ac.jp](mailto:kumar@mine.kyushu-u.ac.jp) (Vellaichamy Balakumar)

## **S1. Experimental section**

### **S1.1 Synthesis of CN**

CN was fabricated via the thermal polycondensation method. First, 4.0 g of urea was placed into a sealed crucible and calcined at 550 °C for 4 h in a muffle furnace with a heating rate of 10 °C min<sup>-1</sup>. After calcination, CN was obtained as a yellow solid product. A similar procedure was adopted to synthesize porous CN with a heating rate of 100 °C min<sup>-1</sup>.

### **S1.2 Photocatalytic experiments**

Photocatalytic degradation of CIP using both the synthesized CN sheet and porous structure was performed under visible light ( $\lambda > 420$  nm) irradiation. First, 50 ml of 10 ppm CIP and 50 mg of catalyst material were magnetically stirred under dark conditions for 10 min to reach adsorption-desorption equilibrium. The suspensions were irradiated using a 500 W Xe lamp with a cut-off filter. Samples were collected and filtered (0.45  $\mu$ m membrane filters) at different time intervals to check the absorbance using UV-Vis spectrometry at a wavelength of 272 nm. Further, sample degradation was measured and confirmed by HPCL. The photocatalytic degradation rate for the reaction was calculated using Eq. (1):

$$-\ln C_t/C_0 = kt \quad (1)$$

where k is the rate constant and  $C_0$  and C are the concentrations of CIP at reaction times of 0 s and t, respectively.

**Table S1** The informations of instrumentation used for characterization and analysis study

| <b>Instrument</b>                                              | <b>Model/Make</b>                                        | <b>Study</b>                                  |
|----------------------------------------------------------------|----------------------------------------------------------|-----------------------------------------------|
| UV–DRS spectroscopy                                            | Shimadzu UV-2450 spectrophotometer                       | Absorbance properties                         |
| FT-IR spectroscopy                                             | Jasco FTIR-670 Plus, Japan                               | Identification of functional groups           |
| X-ray diffraction                                              | Rigaku Ultima IV diffractometer                          | Crystalline structure                         |
| SEM, EDX and mapping analysis                                  | SEM; FlexSEM-1000 with Oxford instruments (EDX)          | Surface morphology and elemental compositions |
| HR-TEM analysis                                                | HR-TEM; JEOL JEM-2100HCKM                                | Structure and surface morphology              |
| Surface area analysis                                          | BEL-Max N <sub>2</sub> porosimeter                       | Specific surface area of materials            |
| X-ray photoelectron spectroscopy                               | ULVAC-PHI ESCA 5800                                      | surface compositions and states               |
| Solid state photoluminescence spectroscopy                     | PL; JASCO F-6600                                         | Photoluminescence properties                  |
| Ultra-high-performance liquid chromatography-mass spectrometry | UHPLC-MS (1290 infinity II/ Qtrap 6500                   | Analysis of intermediate degradation products |
| Electrochemical experiments                                    | Solartron analytical (1280C Electrochemical test system) | Photocurrent and impedance analysis           |

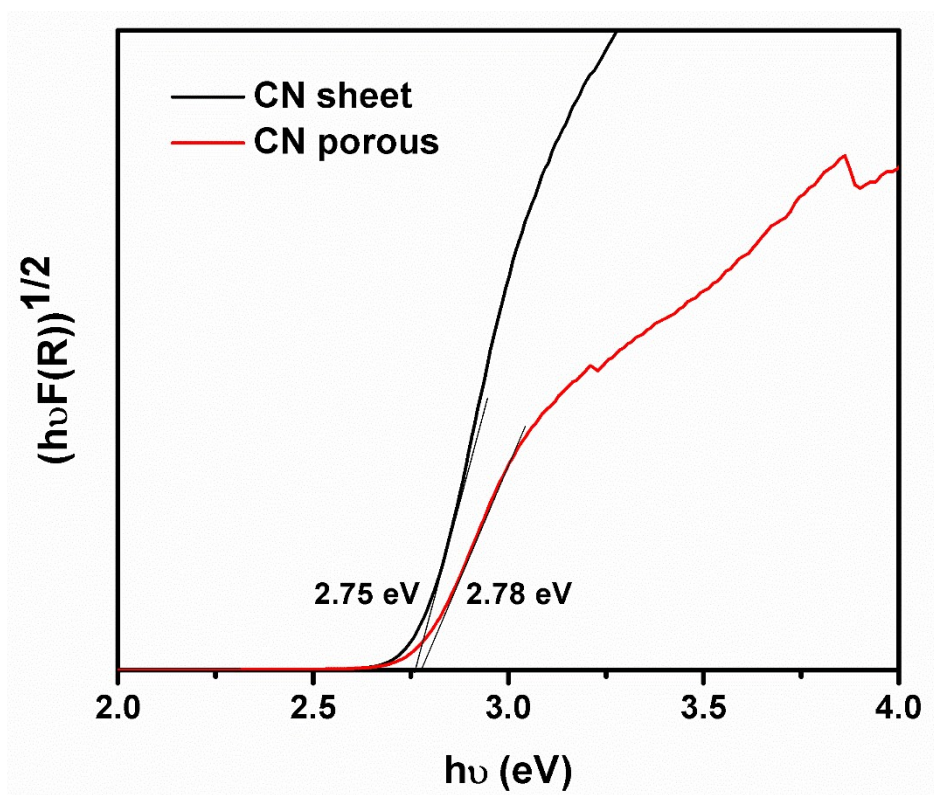

**Fig. S1** Plots between  $(h\nu F(R))^{1/2}$  vs.  $h\nu$  (eV) for synthesized sheet and porous CN.

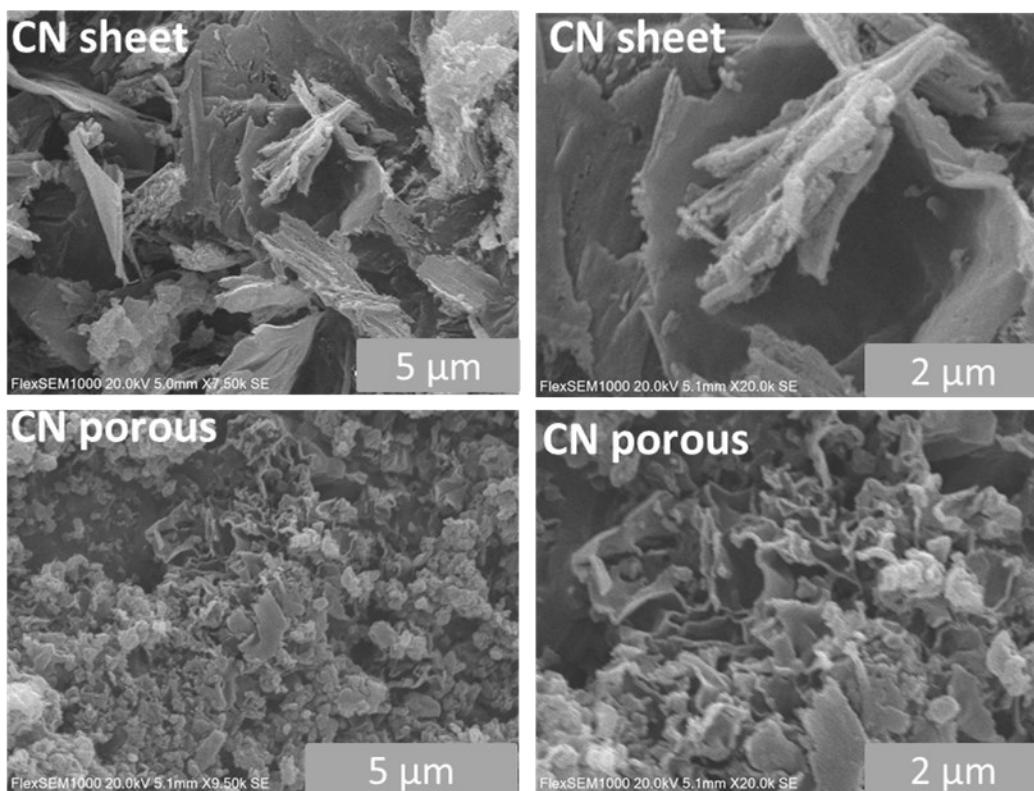

**Fig.S2** Different magnifications SEM images of sheet and porous CN.

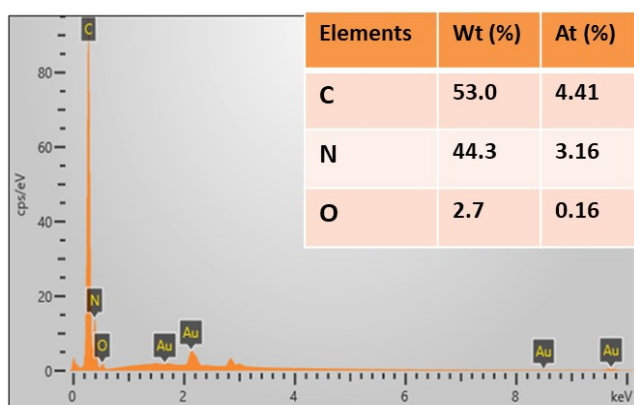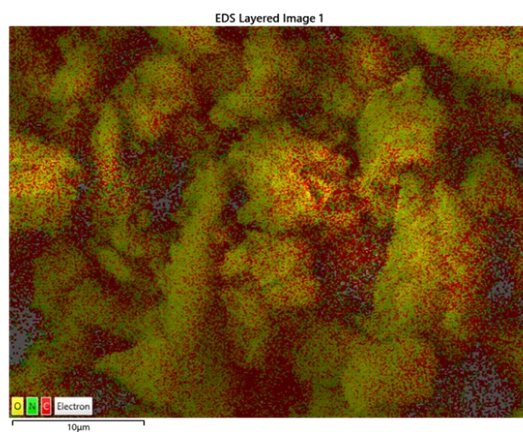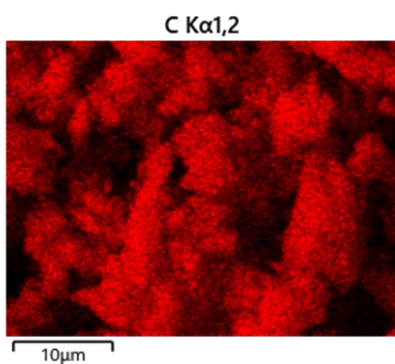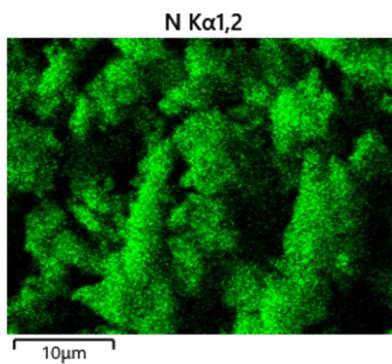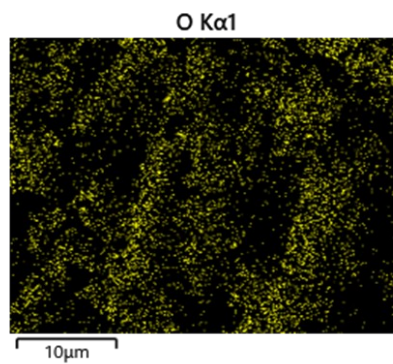

**Fig. S3** EDX and mapping analysis of sheet CN.

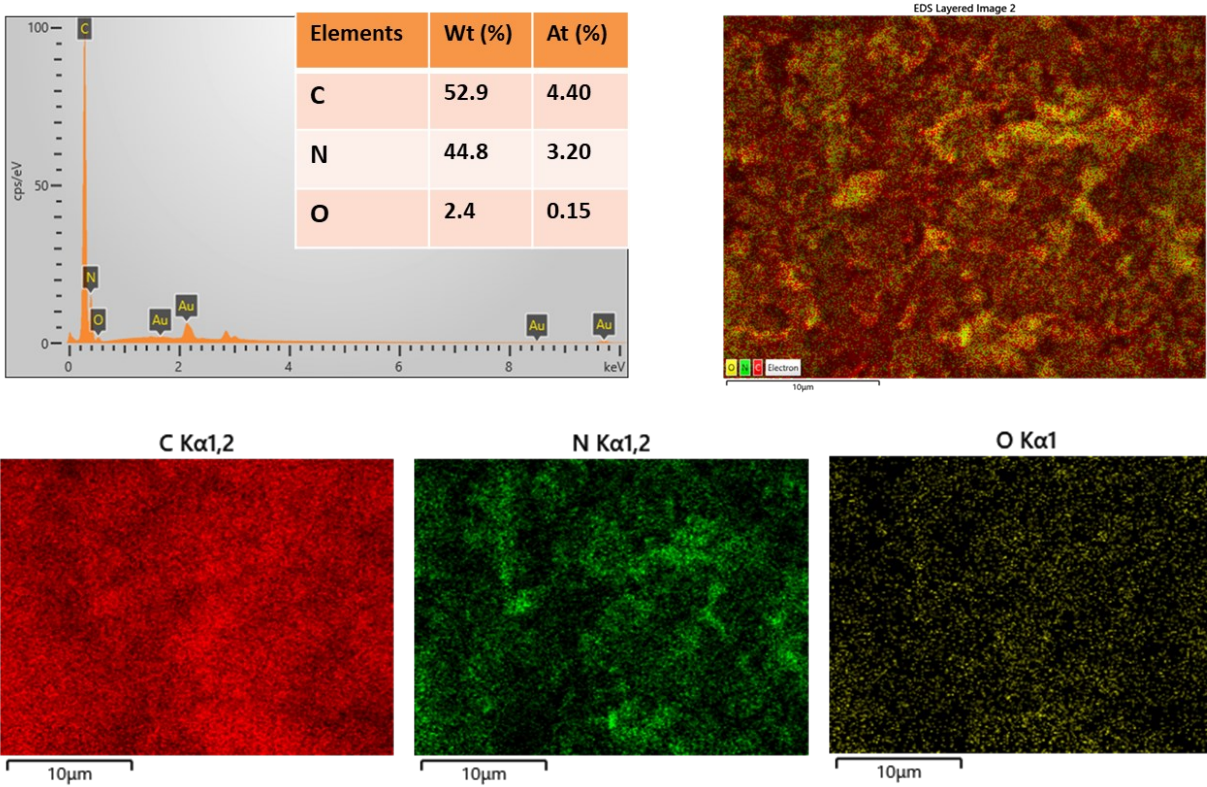

**Fig. S4** EDX and mapping analysis of porous CN.

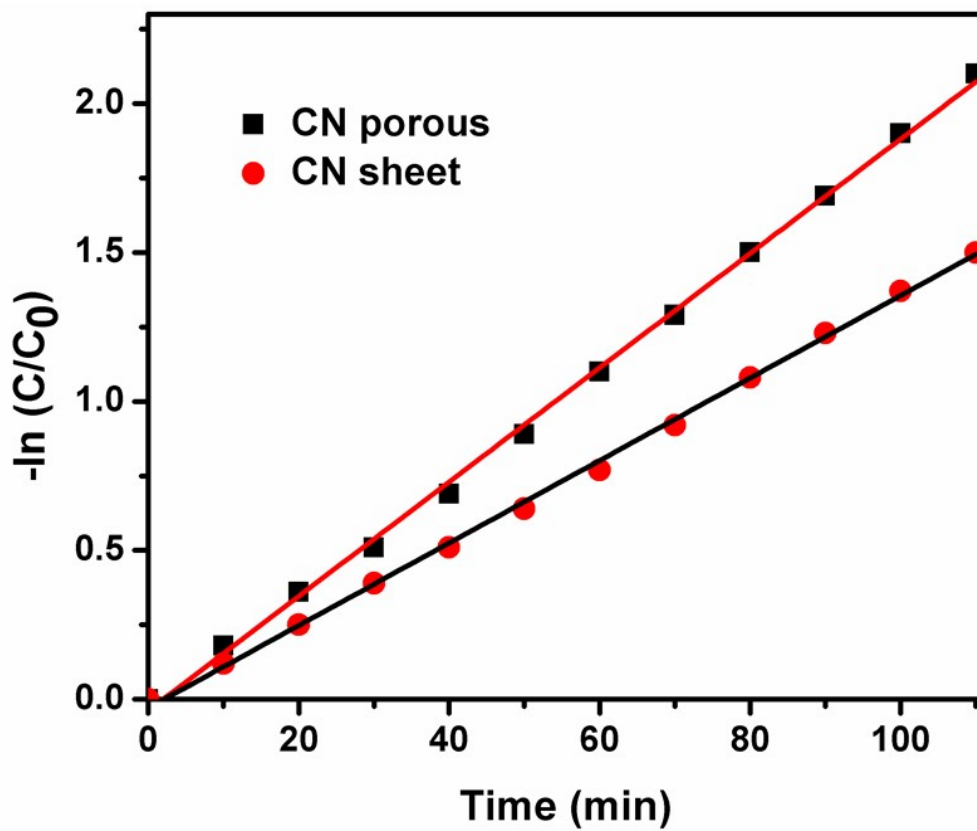

Fig.S5 Kinetics plots for CIP degradation using porous and sheet CN



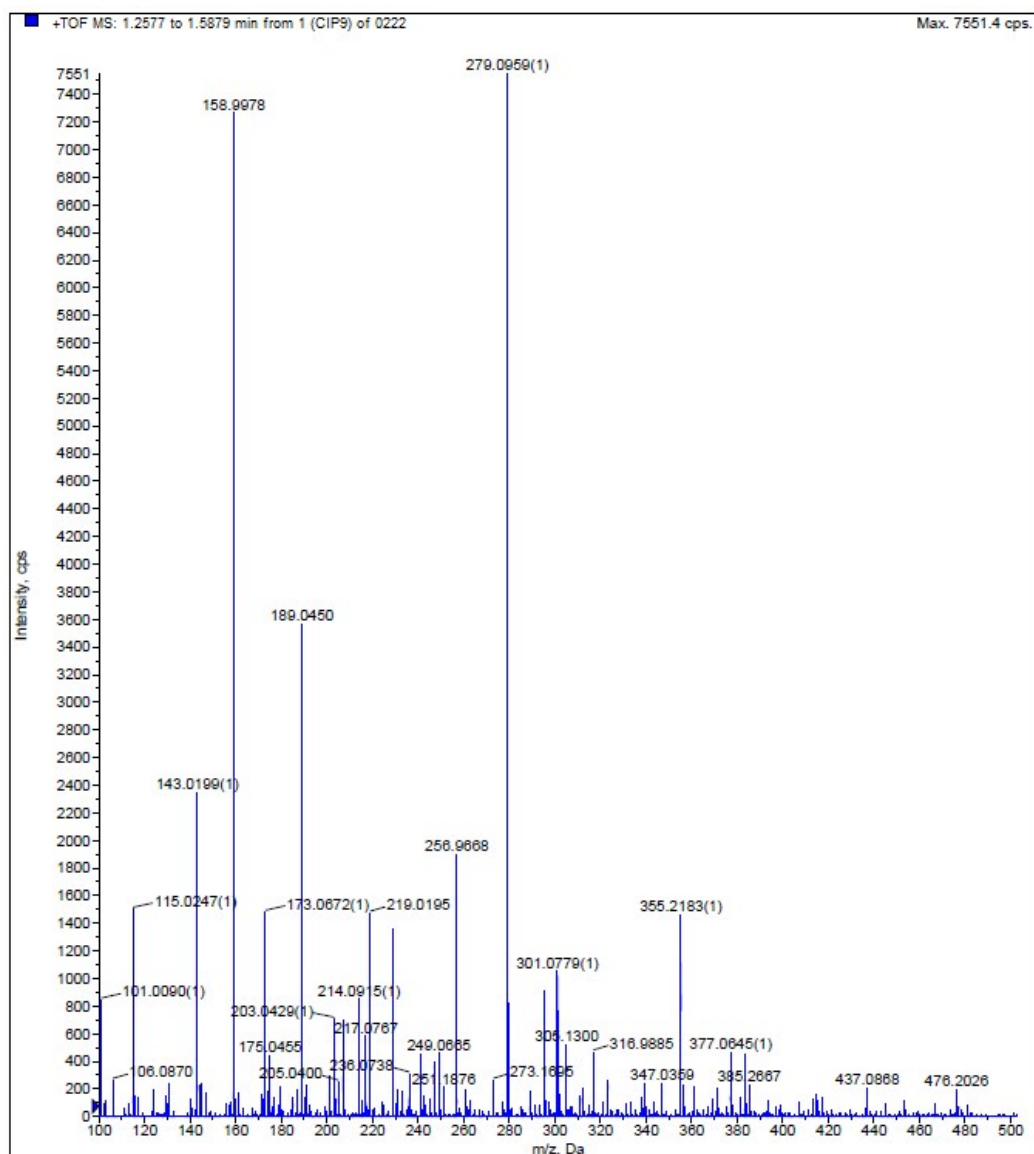

**Fig. S6.** LC-MS analysis of CIP degradation after 110 min using porous CN as photocatalyst.

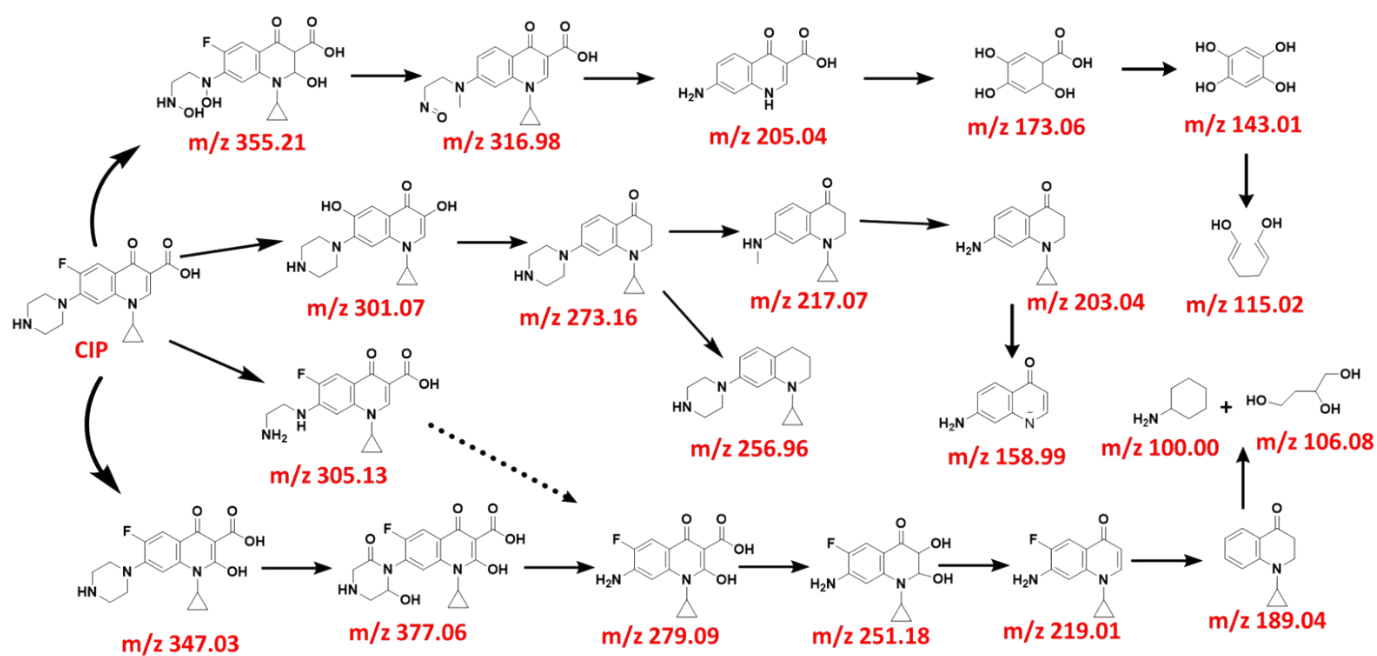

**Scheme S1.** The main degradation pathways of CIP over porous CN.

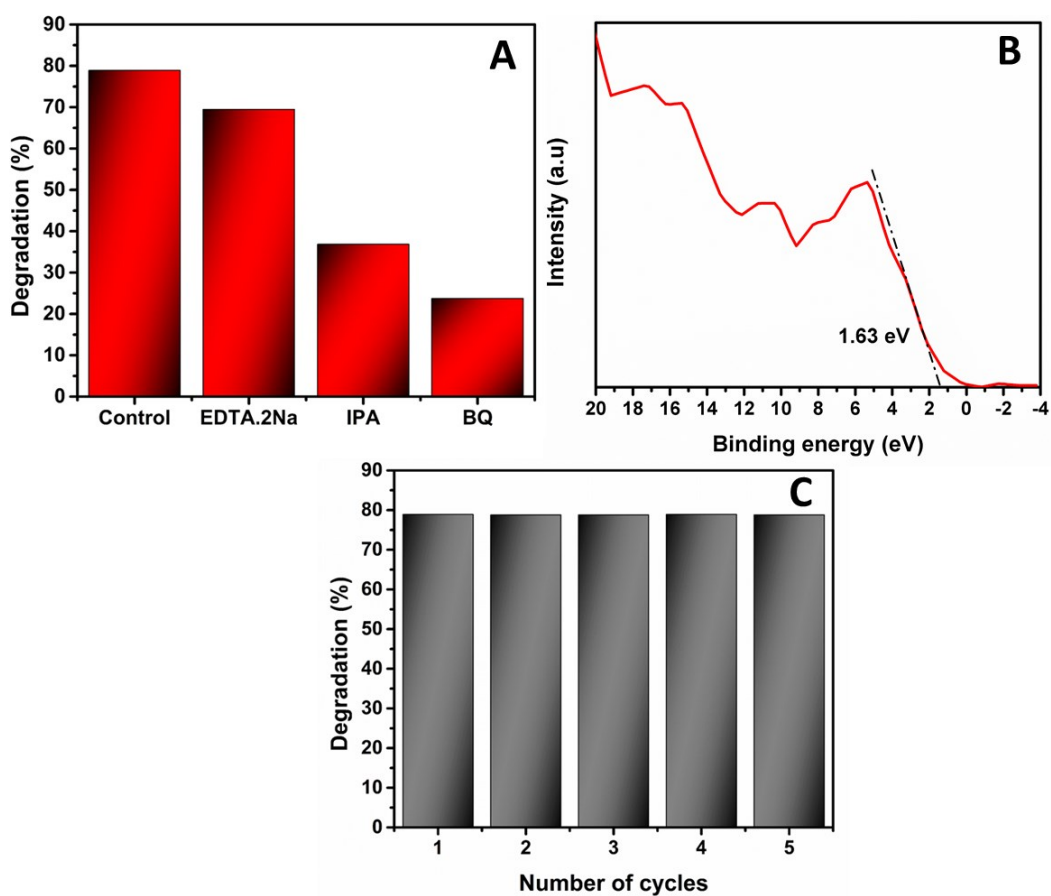

**Fig. S7 (A)** Photocatalytic degradation efficiency of CN porous structure during CIP degradation in the presence of various radical scavengers, **(B)** Valence band energy region of porous CN and **(C)** Photocatalytic degradation efficiency of CN porous structure during five cycles of CIP photocatalytic degradation.
